# Supplementary material for: The impact of single and pairwise Toll-like receptor activation on neuroinflammation and neurodegeneration
Source: PubMed Central journal article supplement (PMC4182775; doi:10.1186/s12974-014-0166-7), 2014-09-20
Supplement: 12974_2014_166_MOESM2_ESM.pdf [file 12974_2014_166_MOESM2_ESM.pdf]

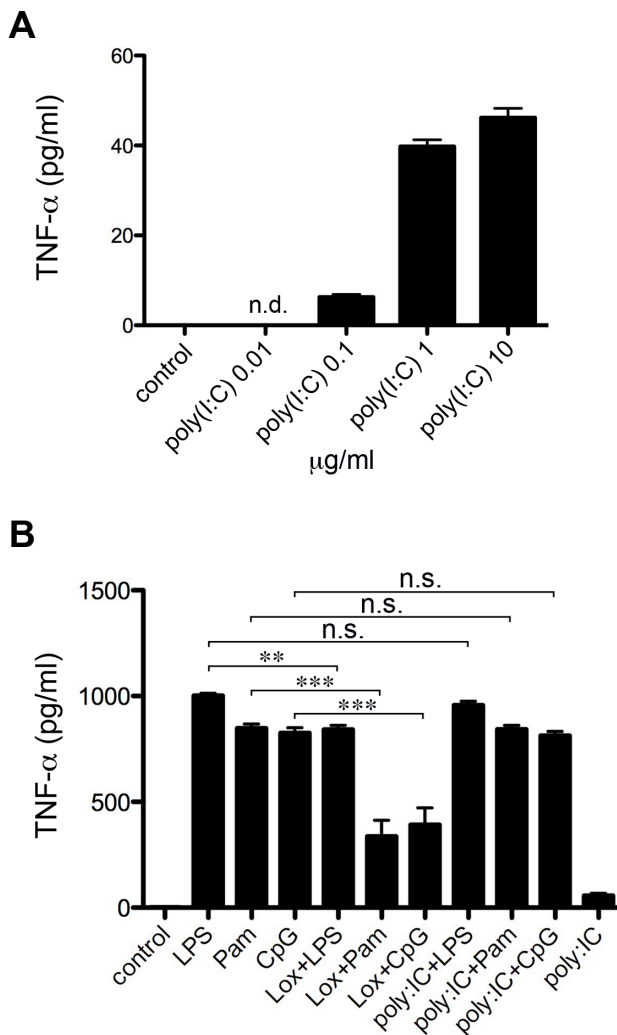

**Supplementary Figure 2. The TLR3-specific ligand poly(I:C) does not suppress TNF- $\alpha$  secretion from microglia incubated with other TLR ligands.** (A) Purified microglia from C57BL/6J mice were incubated for 6 h with various doses of poly(I:C), as indicated. PBS served as control. Supernatants were analyzed by TNF- $\alpha$  ELISA. Results are presented as mean  $\pm$  SEM of 3 independent experiments run with duplicates. n.d., not detected. (B) Purified microglia from C57BL/6J mice were incubated for 6 h with LPS (100 ng/ml), Pam3CysSK4 (Pam, 100 ng/ml), CpG ODN (CpG, 1  $\mu$ M), or poly(I:C) (1  $\mu$ g/ml) alone or simultaneously with pairwise combinations of the ligands, as indicated. PBS served as control. Supernatants were analyzed by TNF- $\alpha$  ELISA. Results are presented as mean  $\pm$  SEM of 3 independent experiments run with duplicates. ANOVA with

Bonferroni-selected pairs of each individual ligand vs. ligand combination, as indicated.  $p^{**}<0.005$ ,  $p^{***}<0.001$ , n.s., not significant.
